# Supplementary material for: The R148.3 Gene Modulates Caenorhabditis elegans Lifespan and Fat Metabolism
Source: PubMed Central journal article supplement (PMC5555478; doi:10.1534/g3.117.041681), 2017-06-15
Supplement: 2739FileS1.pdf [file 2739FileS1.pdf]

# Suppl Figure 1

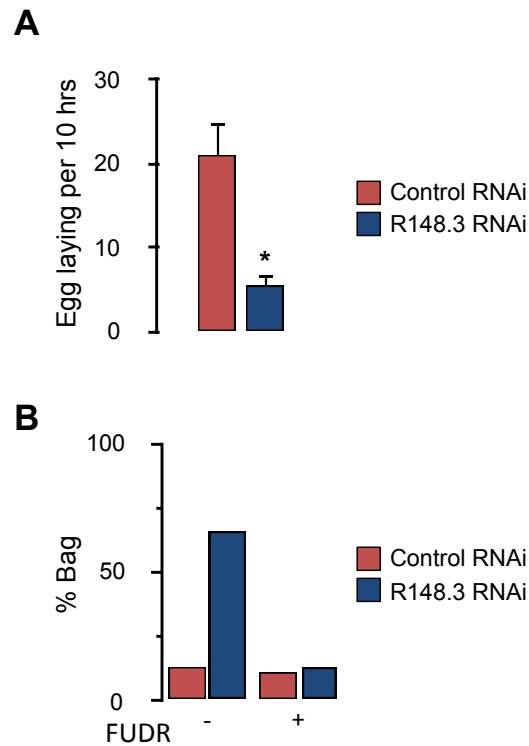

**Figure S1**

## **Reduced R148.3 function induces a *Bag* phenotype.**

(A) Egg laying rate displayed by *control(RNAi)* or *R148.3(RNAi)* worms ( $p < 0.001$ ). (B) Number of worms treated with either empty vector or R148.3 RNAi demonstrating a *Bag* phenotype with or without 50 μM fluorodeoxyuridine (FUdR).

# Suppl Figure 2

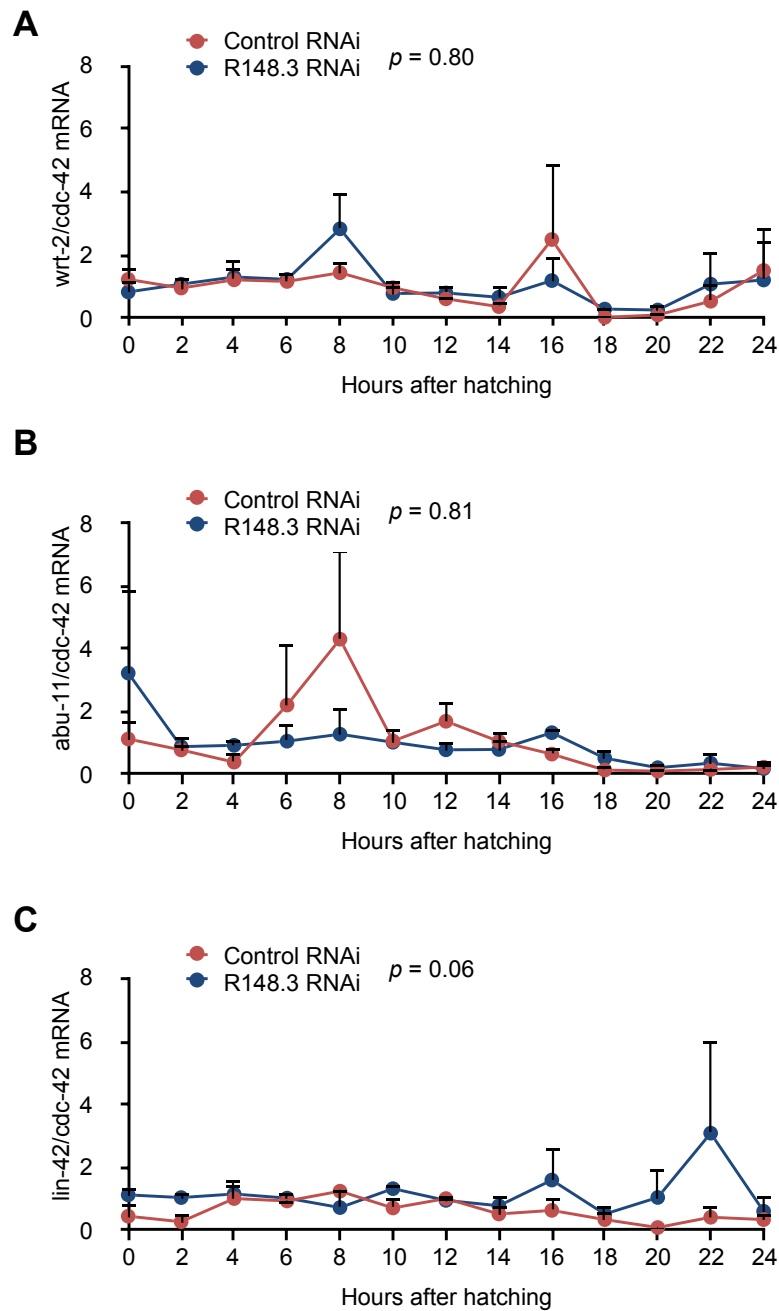

**Figure S2** Loss of R148.3 does not influence expression of early development genes.

(A) *wrt-2*, (B) *abu-11*, and (C) *lin-42* mRNA expression levels in F2+ progeny of parent worms fed either empty vector or R148.3 RNAi, as determined by qPCR.

## Suppl Figure 3

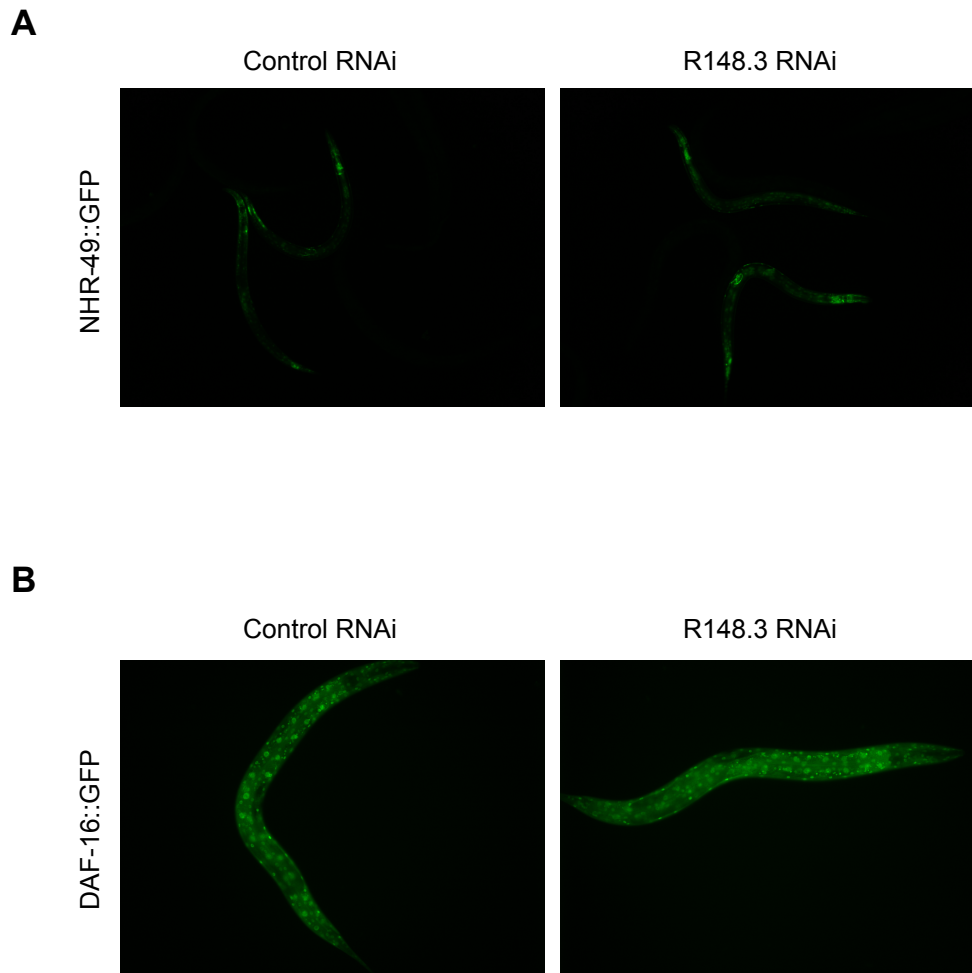

**Figure S3**

**Effects of R148.3 RNAi on NHR-49::GFP and DAF-16::GFP protein levels and localization.**

Representative immunofluorescence on NHR-49::GFP (A) and DAF-16::GFP (B) in L4 transgenic worms treated with either control RNAi or R148.3 RNAi.

# Suppl Figure 4

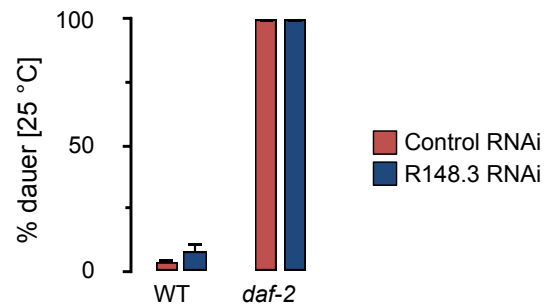

**Figure S4 Loss of R148.3 does not impact the dauer trait of *daf-2* mutants.**

Percentage of synchronized wild-type (WT) and *daf-2* worms treated with either empty vector or R148.3 RNAi showing a dauer phenotype when incubated at 25 °C at L1 stage. Data represent mean  $\pm$  S.E.M. of three independent experiments. n = 673 (WT, control RNAi); 680 (WT, R148.3 RNAi); 661 (*daf-2*, control RNAi); 753 (*daf-2*, R148.3 RNAi).
